# Supplementary material for: Large haplotypes highlight a complex age structure within the maize pan-genome
Source: HighWire-hosted journal article supplement (doi:10.1101/gr.276705.122), 2023-02-28
Supplement: Supplemental_Tables.docx [file Supplemental_Tables.docx]

**Supplemental Table S1**. Structural variants discovered by alignment to B73.

| NAM inbred | Unalignment | | Inversion (>20Kb) | | Tandem Duplication (>10Kb) | |
| --- | --- | --- | --- | --- | --- | --- |
| Number | Total size (bp) | Number | Total size (bp) | Number | Total size (bp) |
| B97 | 68,177 | 854,555,595 | 16 | 7,911,444 | 42 | 2,965,189 |
| CML103 | 75,254 | 912,440,700 | 32 | 9,663,765 | 69 | 4,284,020 |
| CML228 | 76,732 | 957,952,494 | 33 | 17,588,048 | 98 | 10,227,982 |
| CML247 | 79,421 | 977,139,534 | 33 | 9,326,837 | 77 | 6,550,994 |
| CML277 | 78,097 | 955,286,509 | 35 | 9,045,158 | 130 | 6,740,525 |
| CML322 | 76,040 | 930,445,780 | 47 | 50,164,694 | 49 | 5,376,904 |
| CML333 | 75,460 | 931,264,895 | 33 | 13,235,980 | 59 | 6,488,305 |
| CML52 | 77,374 | 970,469,033 | 40 | 36,504,989 | 120 | 7,502,433 |
| CML69 | 77,768 | 949,798,670 | 34 | 19,113,898 | 55 | 5,052,287 |
| HP301 | 73,209 | 893,388,514 | 30 | 11,582,644 | 36 | 3,056,711 |
| IL14H | 76,179 | 932,864,278 | 44 | 37,826,184 | 66 | 5,931,792 |
| Ki11 | 77,548 | 959,218,817 | 37 | 17,999,235 | 58 | 5,937,488 |
| Ki3 | 76,847 | 958,284,549 | 29 | 12,466,038 | 57 | 3,919,777 |
| Ky21 | 68,555 | 849,838,736 | 34 | 19,909,991 | 61 | 3,900,881 |
| M162W | 74,937 | 908,212,468 | 32 | 23,492,103 | 31 | 2,235,391 |
| M37W | 73,446 | 905,759,884 | 37 | 19,253,776 | 42 | 3,580,080 |
| Mo18W | 76,111 | 937,095,984 | 40 | 23,294,264 | 47 | 3,126,914 |
| MS71 | 69,614 | 864,510,512 | 29 | 9,868,632 | 33 | 2,559,303 |
| NC350 | 77,539 | 975,398,973 | 35 | 15,006,973 | 40 | 3,629,420 |
| NC358 | 75,690 | 923,553,028 | 24 | 9,498,126 | 46 | 3,856,304 |
| Oh43 | 68,736 | 850,618,690 | 34 | 23,197,191 | 39 | 3,347,196 |
| Oh7b | 64,488 | 848,093,802 | 28 | 34,566,458 | 68 | 3,505,848 |
| P39 | 77,436 | 957,486,311 | 49 | 61,198,656 | 32 | 2,366,083 |
| Tx303 | 73,671 | 908,204,734 | 27 | 10,108,385 | 46 | 4,204,799 |
| Tzi8 | 76,236 | 935,198,368 | 34 | 12,032,167 | 102 | 6,119,089 |

**Supplemental Table S2**. Structural variants discovered by all-by-all alignment.

| NAM inbred | Unalignment | | Inversion (>20Kb) | | Tandem Duplication (>10Kb) | |
| --- | --- | --- | --- | --- | --- | --- |
| Number | Total size (bp) | Number | Total size (bp) | Number | Total size (bp) |
| B97 | 1,864,565 | 23,201,614,623 | 846 | 485,865,505 | 361 | 31,614,270 |
| CML103 | 1,868,630 | 23,446,644,923 | 908 | 491,579,352 | 493 | 36,128,222 |
| CML228 | 1,888,044 | 23,036,601,666 | 1,062 | 523,874,260 | 866 | 47,803,359 |
| CML247 | 1,840,373 | 23,177,351,167 | 968 | 642,391,508 | 1,624 | 82,660,871 |
| CML277 | 1,887,346 | 23,400,065,853 | 946 | 465,732,603 | 1,159 | 69,208,086 |
| CML322 | 1,889,855 | 23,307,921,784 | 977 | 518,883,162 | 2,296 | 98,269,413 |
| CML333 | 1,883,076 | 23,048,432,319 | 1,216 | 1,318,651,366 | 715 | 49,587,368 |
| CML52 | 1,876,380 | 23,214,366,620 | 1,016 | 579,514,019 | 787 | 62,513,384 |
| CML69 | 1,884,483 | 23,796,325,894 | 1,107 | 975,680,447 | 2,020 | 123,215,200 |
| HP301 | 1,882,911 | 23,105,136,853 | 1,014 | 690,755,700 | 917 | 63,656,299 |
| IL14H | 1,929,453 | 23,839,242,115 | 1,145 | 609,019,793 | 666 | 50,888,192 |
| Ki11 | 2,001,973 | 24,629,586,697 | 1,162 | 1,034,308,544 | 939 | 84,965,425 |
| Ki3 | 1,876,900 | 23,344,115,131 | 1,009 | 829,422,782 | 892 | 79,134,551 |
| Ky21 | 1,859,022 | 22,977,561,730 | 894 | 514,402,839 | 1,170 | 85,187,168 |
| M162W | 1,873,056 | 23,036,486,134 | 934 | 667,807,244 | 1,023 | 79,817,185 |
| M37W | 1,874,963 | 23,064,980,850 | 951 | 774,967,091 | 655 | 51,076,286 |
| Mo18W | 1,875,313 | 23,257,462,325 | 1,056 | 658,529,895 | 841 | 71,737,714 |
| MS71 | 1,894,367 | 23,170,980,625 | 1,103 | 843,131,859 | 977 | 81,226,572 |
| NC350 | 1,871,729 | 23,184,055,773 | 918 | 489,907,781 | 878 | 75,683,812 |
| NC358 | 1,863,788 | 23,417,290,145 | 945 | 580,050,596 | 834 | 86,318,493 |
| Oh43 | 1,859,653 | 22,692,949,899 | 793 | 465,656,495 | 1,144 | 94,734,533 |
| Oh7b | 1,875,159 | 23,255,390,826 | 991 | 774,997,779 | 963 | 77,356,690 |
| P39 | 1,807,681 | 23,386,610,941 | 942 | 995,707,702 | 1,370 | 86,458,035 |
| Tx303 | 1,892,385 | 23,400,128,539 | 1,318 | 1,473,044,687 | 759 | 64,723,417 |
| Tzi8 | 1,861,358 | 22,867,471,386 | 873 | 519,414,980 | 1,204 | 105,642,153 |
